# Supplementary material for: De novo design of immunoreactive conformation-specific HIV-1 epitopes based on Top7 scaffold
Source: Royal Society of Chemistry journal article supplement (doi:10.1039/c3ra41562g), 2013-01-01
Supplement: c3ra41562g.pdf [file c3ra41562g.pdf]

Supplemental table 1. HIV-1 envelope (gp160) amino acid sequences from Latin America viral isolates.

| NCBI access number | Sequence name                                                   | Origin |
|--------------------|-----------------------------------------------------------------|--------|
| AAB37173.1         | Envelope glycoprotein [Human immunodeficiency virus 1]          | Brazil |
| AAT67535.1         | Envelope glycoprotein [Human immunodeficiency virus 1]          | Brazil |
| AAB37172.1         | Envelope glycoprotein [Human immunodeficiency virus 1]          | Brazil |
| AAB06248.1         | Envelope glycoprotein, partial [Human immunodeficiency virus 1] | Brazil |
| AAS75507.1         | Envelope glycoprotein [Human immunodeficiency virus 1]          | Brazil |
| AAD03179.1         | Envelope gp160 precursor [Human immunodeficiency virus 1]       | Brazil |
| AAO63238.1         | Envelope glycoprotein [Human immunodeficiency virus 1]          | Brazil |
| ACF04037.1         | Envelope glycoprotein [Human immunodeficiency virus 1]          | Brazil |
| AAS59192.1         | Env glycoprotein [Human immunodeficiency virus 1]               | Brazil |
| ADG07948.1         | Envelope glycoprotein [Human immunodeficiency virus 1]          | Brazil |
| AAO63246.1         | Envelope glycoprotein [Human immunodeficiency virus 1]          | Brazil |
| ACS91473.1         | Envelope glycoprotein [Human immunodeficiency virus 1]          | Brazil |
| AAS75508.1         | Envelope glycoprotein [Human immunodeficiency virus 1]          | Brazil |
| AAS59219.1         | Env glycoprotein [Human immunodeficiency virus 1]               | Brazil |
| AAS59210.1         | Env glycoprotein [Human immunodeficiency virus 1]               | Brazil |
| AAS59238.1         | Env glycoprotein [Human immunodeficiency virus 1]               | Brazil |
| ABC88271.1         | Envelope glycoprotein [Human immunodeficiency virus 1]          | Brazil |
| ACS91482.1         | Envelope glycoprotein [Human immunodeficiency virus 1]          | Brazil |
| AAB06242.1         | Envelope glycoprotein, partial [Human immunodeficiency virus 1] | Brazil |
| AAB06246.1         | Envelope glycoprotein, partial [Human immunodeficiency virus 1] | Brazil |
| ACF04053.1         | Envelope glycoprotein [Human immunodeficiency virus 1]          | Brazil |
| ABC88298.1         | Envelope glycoprotein [Human immunodeficiency virus 1]          | Brazil |
| ABC88280.1         | Envelope glycoprotein [Human immunodeficiency virus 1]          | Brazil |
| AAB06244.1         | Envelope glycoprotein, partial [Human immunodeficiency virus 1] | Brazil |
| AAT67554.1         | Envelope glycoprotein [Human immunodeficiency virus 1]          | Brazil |

Supplemental table 1 (continued). HIV-1 envelope (gp160) amino acid sequences from Latin America viral isolates.

| NCBI access number | Sequence name                                          | Origin    |
|--------------------|--------------------------------------------------------|-----------|
| ADN52451.1         | Envelope glycoprotein [Human immunodeficiency virus 1] | Brazil    |
| ACS91491.1         | Envelope glycoprotein [Human immunodeficiency virus 1] | Brazil    |
| AAT67533.1         | Envelope glycoprotein [Human immunodeficiency virus 1] | Brazil    |
| ADG07984.1         | Envelope glycoprotein [Human immunodeficiency virus 1] | Brazil    |
| AAS59247.1         | Env glycoprotein [Human immunodeficiency virus 1]      | Brazil    |
| ADG07939.1         | Envelope glycoprotein [Human immunodeficiency virus 1] | Brazil    |
| ADG07966.1         | Envelope glycoprotein [Human immunodeficiency virus 1] | Brazil    |
| ACF04045.1         | Envelope glycoprotein [Human immunodeficiency virus 1] | Brazil    |
| AAS59229.1         | Env glycoprotein [Human immunodeficiency virus 1]      | Brazil    |
| AAT67534.1         | Envelope glycoprotein [Human immunodeficiency virus 1] | Brazil    |
| AEK79457.1         | Envelope glycoprotein [Human immunodeficiency virus 1] | Uruguay   |
| AEK79442.1         | Envelope glycoprotein [Human immunodeficiency virus 1] | Uruguay   |
| AEK79464.1         | Envelope glycoprotein [Human immunodeficiency virus 1] | Uruguay   |
| AEK79450.1         | Envelope glycoprotein [Human immunodeficiency virus 1] | Uruguay   |
| AEK79400.1         | Envelope glycoprotein [Human immunodeficiency virus 1] | Uruguay   |
| ACI39918.1         | Envelope glycoprotein [Human immunodeficiency virus 1] | Uruguay   |
| ACI39927.1         | Envelope glycoprotein [Human immunodeficiency virus 1] | Uruguay   |
| AAK69318.1         | Envelope glycoprotein [Human immunodeficiency virus 1] | Uruguay   |
| ACI39900.1         | Envelope glycoprotein [Human immunodeficiency virus 1] | Uruguay   |
| ACI39909.1         | Envelope glycoprotein [Human immunodeficiency virus 1] | Uruguay   |
| AAL12693.1         | Envelope glycoprotein [Human immunodeficiency virus 1] | Uruguay   |
| AAL12684.1         | Envelope glycoprotein [Human immunodeficiency virus 1] | Bolivia   |
| AAL12738.1         | Envelope glycoprotein [Human immunodeficiency virus 1] | Argentina |
| AAL07749.1         | Envelope glycoprotein [Human immunodeficiency virus 1] | Argentina |
| ABA43649.1         | Envelope glycoprotein [Human immunodeficiency virus 1] | Argentina |

Supplemental table 1 (continued). HIV-1 envelope (gp160) amino acid sequences from Latin America viral isolates.

| NCBI access number | Sequence name                                          | Origin    |
|--------------------|--------------------------------------------------------|-----------|
| AAL07704.1         | Envelope glycoprotein [Human immunodeficiency virus 1] | Argentina |
| AAL07696.1         | Envelope glycoprotein [Human immunodeficiency virus 1] | Argentina |
| AAL07740.1         | Envelope glycoprotein [Human immunodeficiency virus 1] | Argentina |
| AAL12726.1         | Envelope glycoprotein [Human immunodeficiency virus 1] | Argentina |
| AAL07555.1         | Envelope glycoprotein [Human immunodeficiency virus 1] | Argentina |
| AAL07731.1         | Envelope glycoprotein [Human immunodeficiency virus 1] | Argentina |
| AAL12747.1         | Envelope glycoprotein [Human immunodeficiency virus 1] | Argentina |
| ACN72604.1         | Env protein [Human immunodeficiency virus 1]           | Chile     |
| ADX96016.1         | Envelope glycoprotein [Human immunodeficiency virus 1] | Chile     |
| AAT11217.1         | Envelope glycoprotein [Human immunodeficiency virus 1] | Chile     |
| AEK79337.1         | Envelope glycoprotein [Human immunodeficiency virus 1] | Paraguay  |
| ACD02811.1         | Envelope glycoprotein [Human immunodeficiency virus 1] | Paraguay  |
| AEK79366.1         | Envelope glycoprotein [Human immunodeficiency virus 1] | Paraguay  |
| AEK79344.1         | Envelope glycoprotein [Human immunodeficiency virus 1] | Paraguay  |
